# Supplementary material
Source: PubMed Central journal article supplement (PMC8544416)
Supplement: jb.00375-21-s0001.pdf [file jb.00375-21-s0001.pdf]

**Supplementary Information to “SPONTANEOUS MUTANTS OF  
*STREPTOCOCCUS SANGUINIS* WITH DEFECTS IN THE GLUCOSE-PTS SHOW  
ENHANCED POST-EXPONENTIAL PHASE FITNESS”**

Lin Zeng<sup>#</sup>, Alejandro R. Walker, Kyulim Lee, Zachary A. Taylor, and Robert A.  
Burne

Department of Oral Biology, University of Florida College of Dentistry,  
1395 Center Drive, Gainesville, Florida, USA.

Includes Tables S1&S2, and Figures S1 to S7.

**Table S1.** Single nucleotide polymorphisms (SNPs) in three SK36 stocks in comparison to SK36 genome published at the GenBank.

| Position | Mutation | Annotation                                            | Gene                             | Description                                                                      |
|----------|----------|-------------------------------------------------------|----------------------------------|----------------------------------------------------------------------------------|
| 137,500  | Δ1 bp    | pseudogene<br>(164/604 nt)                            | SSA_RS00875 →                    | hypothetical protein                                                             |
| 138,032  | T→A      | intergenic<br>(+92/+51)                               | SSA_RS00875 → /<br>← SSA_RS00880 | hypothetical protein/TetR/AcrR<br>family transcriptional regulator               |
| 138,086  | T→G      | S190S<br>(TCA→TCC)                                    | SSA_RS00880 ←                    | TetR/AcrR family<br>transcriptional regulator                                    |
| 157,709  | T→G      | intergenic<br>(+593/+691)                             | SSA_RS00950 → /<br>← SSA_RS00955 | beta-carotene<br>15,15'-monooxygenase/hypoth<br>etical protein                   |
| 358,487  | T→G      | H13Q<br>(CAT→CAG)                                     | SSA_RS01945 →                    | DUF2268 domain-containing<br>protein                                             |
| 458,657  | +A       | intergenic<br>(-117/-78)                              | SSA_RS02370 ← /<br>→ SSA_RS02375 | sucrose-6-phosphate<br>hydrolase/PTS beta-glucoside<br>transporter subunit IIBCA |
| 492,271  | C→T      | P182S<br>(CCA→TCA)<br>pseudogene<br>(1745/1830<br>nt) | SSA_RS02555 →                    | NADH-dependent flavin<br>oxidoreductase                                          |
| 551,499  | +A       | pseudogene<br>(1753/1830<br>nt)                       | SSA_RS02850 →                    | hypothetical protein                                                             |
| 551,507  | Δ1 bp    | pseudogene<br>(1771/1830<br>nt)                       | SSA_RS02850 →                    | hypothetical protein                                                             |
| 551,525  | T→A      | pseudogene<br>(1774/1830<br>nt)                       | SSA_RS02850 →                    | hypothetical protein                                                             |
| 551,528  | C→A      | nt)                                                   | SSA_RS02850 →                    | hypothetical protein                                                             |
| 551,601  | C→A      | intergenic<br>(+17/-4)                                | SSA_RS02850 → /<br>→ SSA_RS02855 | hypothetical<br>protein/hypothetical protein                                     |
| 551,616  | C→A      | S4R<br>(AGC→AGA)                                      | SSA_RS02855 →                    | hypothetical protein                                                             |
| 577,069  | (G)5→4   | pseudogene<br>(90/367 nt)<br>coding (2/417<br>nt)     | SSA_RS02995 →                    | hypothetical protein<br>GNAT family                                              |
| 648,433  | +T       | R76G                                                  | SSA_RS03360 →                    | N-acetyltransferase                                                              |
| 648,657  | C→G      | (CGA→GGA)                                             | SSA_RS03360 →                    | GNAT family<br>N-acetyltransferase                                               |
| 685,509  | T→A      | intergenic<br>(+93/-119)                              | SSA_RS03540 → /<br>→ acnA        | magnesium transporter CorA<br>family protein/aconitate<br>hydratase AcnA         |

|           |         |                                          |                           |                                                                          |
|-----------|---------|------------------------------------------|---------------------------|--------------------------------------------------------------------------|
| 685,551   | 2 bp→A  | intergenic<br>(+135/-76)                 | SSA_RS03540 → /<br>→ acnA | magnesium transporter CorA<br>family protein/aconitate<br>hydratase AcnA |
| 685,554   | C→T     | intergenic<br>(+138/-74)                 | SSA_RS03540 → /<br>→ acnA | magnesium transporter CorA<br>family protein/aconitate<br>hydratase AcnA |
| 685,556   | C→A     | intergenic<br>(+140/-72)                 | SSA_RS03540 → /<br>→ acnA | magnesium transporter CorA<br>family protein/aconitate<br>hydratase AcnA |
| 685,558   | 1 bp→AA | intergenic<br>(+142/-70)                 | SSA_RS03540 → /<br>→ acnA | magnesium transporter CorA<br>family protein/aconitate<br>hydratase AcnA |
| 714,548   | Δ1 bp   | pseudogene<br>(721/910 nt)               | SSA_RS03665 →             | CPBP family intramembrane<br>metalloprotease                             |
| 714,550   | G→T     | pseudogene<br>(723/910 nt)<br>Y16F       | SSA_RS03665 →             | CPBP family intramembrane<br>metalloprotease                             |
| 784,486   | A→T     | (TAT→TTT)<br>Y17S                        | SSA_RS04010 →             | TIGR00159 family protein                                                 |
| 784,489   | A→C     | (TAT→TCT)<br>coding<br>(8953/8973<br>nt) | SSA_RS04010 →             | TIGR00159 family protein                                                 |
| 902,998   | +A      | H155R                                    | SSA_RS04485 →             | YSIRK-type signal<br>peptide-containing protein                          |
| 920,303   | A→G     | (CAC→CGC)<br>coding<br>(911/1353 nt)     | SSA_RS04505 →             | ABC transporter<br>substrate-binding protein                             |
| 1,079,878 | +G      | P307T                                    | SSA_RS05245 →             | VWA domain-containing<br>protein                                         |
| 1,079,886 | C→A     | (CCC→ACC)<br>P311Q                       | SSA_RS05245 →             | VWA domain-containing<br>protein                                         |
| 1,079,899 | C→A     | (CCA→CAA)<br>coding<br>(937/1353 nt)     | SSA_RS05245 →             | VWA domain-containing<br>protein                                         |
| 1,079,904 | Δ1 bp   | coding<br>(950/1353 nt)                  | SSA_RS05245 →             | VWA domain-containing<br>protein                                         |
| 1,079,917 | +T      | coding<br>(955/1353 nt)                  | SSA_RS05245 →             | VWA domain-containing<br>protein                                         |
| 1,079,922 | Δ1 bp   | coding<br>(95/1047 nt)                   | SSA_RS05245 →             | VWA domain-containing<br>protein                                         |
| 1,205,479 | Δ1 bp   | P188T                                    | SSA_RS05775 ←             | alpha-ketoacid dehydrogenase<br>subunit beta                             |
| 1,222,228 | G→T     | (CCC→ACC)<br>G179G                       | SSA_RS05865 ←             | DNA alkylation repair protein                                            |
| 1,222,253 | C→G     | (GGG→GGC)<br>F174I                       | SSA_RS05865 ←             | DNA alkylation repair protein                                            |
| 1,222,270 | A→T     | (TTT→ATT)<br>P170T                       | SSA_RS05865 ←             | DNA alkylation repair protein                                            |
| 1,222,282 | G→T     | (CCA→ACA)                                | SSA_RS05865 ←             | DNA alkylation repair protein                                            |

|                        |         |                              |                                  |                                                                             |
|------------------------|---------|------------------------------|----------------------------------|-----------------------------------------------------------------------------|
| 1,222,287              | G→C     | A168G<br>(GCC→GGC)           | SSA_RS05865 ←                    | DNA alkylation repair protein                                               |
| 1,222,312              | T→C     | K160E<br>(AAG→GAG)           | SSA_RS05865 ←                    | DNA alkylation repair protein                                               |
| 1,222,363              | Δ1 bp   | coding<br>(427/651 nt)       | SSA_RS05865 ←                    | DNA alkylation repair protein                                               |
| 1,222,375 <sup>A</sup> | +A      | coding<br>(415/651 nt)       | SSA_RS05865 ←                    | DNA alkylation repair protein                                               |
| 1,222,378 <sup>B</sup> | C→A     | G138W<br>(GGG→TGG)           | SSA_RS05865 ←                    | DNA alkylation repair protein                                               |
| 1,222,384              | T→C     | N136D<br>(AAT→GAT)           | SSA_RS05865 ←                    | DNA alkylation repair protein                                               |
| 1,222,387              | T→C     | K135E<br>(AAG→GAG)           | SSA_RS05865 ←                    | DNA alkylation repair protein                                               |
| 1,222,393              | +A      | coding<br>(397/651 nt)       | SSA_RS05865 ←                    | DNA alkylation repair protein                                               |
| 1,222,396              | T→C     | K132E<br>(AAG→GAG)           | SSA_RS05865 ←                    | DNA alkylation repair protein                                               |
| 1,222,399              | A→G     | L131L<br>(TTG→CTG)           | SSA_RS05865 ←                    | DNA alkylation repair protein                                               |
| 1,222,405              | +A      | coding<br>(385/651 nt)       | SSA_RS05865 ←                    | DNA alkylation repair protein                                               |
| 1,222,419              | +T      | coding<br>(371/651 nt)       | SSA_RS05865 ←                    | DNA alkylation repair protein                                               |
| 1,222,422              | T→G     | Q123P<br>(CAA→CCA)           | SSA_RS05865 ←                    | DNA alkylation repair protein                                               |
| 1,222,428              | 2 bp→CG | coding<br>(361-362/651 nt)   | SSA_RS05865 ←                    | DNA alkylation repair protein                                               |
| 1,222,433              | C→A     | M119I<br>(ATG→ATT)           | SSA_RS05865 ←                    | DNA alkylation repair protein                                               |
| 1,245,886              | +T      | pseudogene<br>(1077/1202 nt) | rpsA ←                           | 30S ribosomal protein S1                                                    |
| 1,247,787              | G→A     | F304F<br>(TTC→TTT)           | SSA_RS06020 ←                    | branched-chain amino acid<br>aminotransferase                               |
| 1,299,320              | C→A     | intergenic<br>(-14/+333)     | SSA_RS06265 ← /<br>← SSA_RS06270 | M15 family<br>metallopeptidase/rhodanese-li<br>ke domain-containing protein |
| 1,332,042              | A→G     | L34P<br>(CTA→CCA)            | SSA_RS06460 ←                    | hypothetical protein                                                        |
| 1,355,483              | A→G     | V11A<br>(GTT→GCT)            | SSA_RS06585 ←                    | pneumococcal-type histidine<br>triad protein                                |
| 1,543,365              | G→A     | intergenic<br>(-87/-384)     | SSA_RS07505 ← /<br>→ SSA_RS07510 | cyclase family protein/biotin<br>transporter BioY                           |

|           |         |                               |                                  |                                                                                  |
|-----------|---------|-------------------------------|----------------------------------|----------------------------------------------------------------------------------|
| 1,543,598 | C→T     | intergenic<br>(-320/-151)     | SSA_RS07505 ← /<br>→ SSA_RS07510 | cyclase family protein/biotin<br>transporter BioY                                |
| 1,543,690 | G→A     | intergenic<br>(-412/-59)      | SSA_RS07505 ← /<br>→ SSA_RS07510 | cyclase family protein/biotin<br>transporter BioY                                |
| 1,543,703 | +A      | intergenic<br>(-425/-46)      | SSA_RS07505 ← /<br>→ SSA_RS07510 | cyclase family protein/biotin<br>transporter BioY                                |
| 1,572,746 | A→T     | intergenic<br>(+56/-53)       | SSA_RS07660 → /<br>→ SSA_RS07665 | amino acid ABC transporter<br>permease/hypothetical protein                      |
| 1,572,759 | 2 bp→TG | intergenic<br>(+69/-39)       | SSA_RS07660 → /<br>→ SSA_RS07665 | amino acid ABC transporter<br>permease/hypothetical protein                      |
| 1,572,767 | G→A     | intergenic<br>(+77/-32)       | SSA_RS07660 → /<br>→ SSA_RS07665 | amino acid ABC transporter<br>permease/hypothetical protein                      |
| 1,572,770 | G→A     | intergenic<br>(+80/-29)       | SSA_RS07660 → /<br>→ SSA_RS07665 | amino acid ABC transporter<br>permease/hypothetical protein                      |
| 1,572,785 | C→A     | intergenic<br>(+95/-14)       | SSA_RS07660 → /<br>→ SSA_RS07665 | amino acid ABC transporter<br>permease/hypothetical protein                      |
| 1,572,793 | G→A     | intergenic<br>(+103/-6)       | SSA_RS07660 → /<br>→ SSA_RS07665 | amino acid ABC transporter<br>permease/hypothetical protein                      |
| 1,632,654 | +G      | intergenic<br>(-26/+42)       | SSA_RS07975 ← /<br>← SSA_RS07980 | class C<br>sortase/isopeptide-forming<br>domain-containing fimbrial<br>protein   |
| 1,668,222 | C→A     | C104F<br>(TGT→TTT)            | SSA_RS08140 ←                    | hypothetical protein                                                             |
| 1,670,834 | Δ1 bp   | pseudogene<br>(104/418 nt)    | SSA_RS08155 ←                    | DUF3021 domain-containing<br>protein                                             |
| 1,759,713 | T→A     | Y157F<br>(TAT→TTT)            | SSA_RS08615 ←                    | ECF transporter S component                                                      |
| 1,760,293 | T→A     | intergenic<br>(-111/+286)     | SSA_RS08615 ← /<br>← SSA_RS08620 | ECF transporter S<br>component/tRNA<br>(cytidine(34)-2'-O)-methyltrans<br>ferase |
| 1,760,397 | G→T     | intergenic<br>(-215/+182)     | SSA_RS08615 ← /<br>← SSA_RS08620 | ECF transporter S<br>component/tRNA<br>(cytidine(34)-2'-O)-methyltrans<br>ferase |
| 1,772,677 | +C      | coding<br>(270/492 nt)        | SSA_RS08695 ←                    | HD domain-containing protein                                                     |
| 1,772,682 | Δ1 bp   | coding<br>(265/492 nt)        | SSA_RS08695 ←                    | HD domain-containing protein                                                     |
| 1,821,025 | 2 bp→GC | coding<br>(551-552/777<br>nt) | SSA_RS08900 →                    | aminoglycoside<br>3'-phosphotransferase                                          |

|           |            |                                                            |                                                   |                                                                                    |
|-----------|------------|------------------------------------------------------------|---------------------------------------------------|------------------------------------------------------------------------------------|
| 1,821,030 | T→C        | S186P<br>(TCC→CCC)<br>pseudogene<br>(353/2085 nt)          | SSA_RS08900 →                                     | aminoglycoside<br>3'-phosphotransferase                                            |
| 1,884,838 | A→T        | pseudogene<br>(351/2085 nt)                                | SSA_RS09235 ←                                     | helicase                                                                           |
| 1,884,840 | C→A        | pseudogene<br>(349/2085 nt)                                | SSA_RS09235 ←                                     | helicase                                                                           |
| 1,884,842 | T→C        | pseudogene<br>(346/2085 nt)                                | SSA_RS09235 ←                                     | helicase                                                                           |
| 1,884,845 | G→A        | pseudogene<br>(341/2085 nt)                                | SSA_RS09235 ←                                     | helicase                                                                           |
| 1,884,850 | Δ1 bp      | pseudogene<br>(338-339/2085 nt)                            | SSA_RS09235 ←                                     | helicase                                                                           |
| 1,884,852 | 2 bp→TT    | 5 nt)                                                      | SSA_RS09235 ←                                     | helicase                                                                           |
| 1,884,858 | Δ1 bp      | pseudogene<br>(333/2085 nt)                                | SSA_RS09235 ←                                     | helicase                                                                           |
| 1,884,874 | C→T        | pseudogene<br>(317/2085 nt)                                | SSA_RS09235 ←                                     | helicase                                                                           |
| 1,884,876 | C→T        | pseudogene<br>(315/2085 nt)                                | SSA_RS09235 ←                                     | helicase                                                                           |
| 1,884,878 | 2 bp→TT    | pseudogene<br>(312-313/2085 nt)                            | SSA_RS09235 ←                                     | helicase                                                                           |
| 1,884,881 | C→T        | pseudogene<br>(310/2085 nt)                                | SSA_RS09235 ←                                     | helicase                                                                           |
| 1,884,888 | Δ1 bp      | pseudogene<br>(303/2085 nt)                                | SSA_RS09235 ←                                     | helicase                                                                           |
| 1,884,893 | 2 bp→TT    | pseudogene<br>(297-298/2085 nt)                            | SSA_RS09235 ←                                     | helicase                                                                           |
| 1,884,897 | C→T        | 5 nt)                                                      | SSA_RS09235 ←                                     | helicase                                                                           |
| 1,884,899 | A→C        | pseudogene<br>(294/2085 nt)                                | SSA_RS09235 ←                                     | helicase                                                                           |
| 1,884,901 | C→A        | pseudogene<br>(292/2085 nt)                                | SSA_RS09235 ←                                     | helicase                                                                           |
| 1,929,294 | (18-bp)2→1 | pseudogene<br>(290/2085 nt)<br>coding<br>(458-475/1383 nt) | SSA_RS09235 ←                                     | helicase                                                                           |
| 1,976,025 | Δ1 bp      | intergenic<br>(-62/+866)                                   | SSA_RS09485 →<br>SSA_RS09690 ← /<br>← SSA_RS09695 | aspartate kinase<br>LytTR family transcriptional<br>regulator/hypothetical protein |
| 1,976,027 | Δ1 bp      | intergenic<br>(-64/+864)                                   | SSA_RS09690 ← /<br>← SSA_RS09695                  | LytTR family transcriptional<br>regulator/hypothetical protein                     |
| 1,989,366 | A→T        | S233T<br>(TCT→ACT)                                         | SSA_RS09750 ←                                     | fructose-bisphosphate<br>aldolase                                                  |

|           |          |                                                     |                                  |                                                                  |
|-----------|----------|-----------------------------------------------------|----------------------------------|------------------------------------------------------------------|
| 1,989,622 | T→G      | I147I<br>(ATA→ATC)<br>coding<br>(425-426/882<br>nt) | SSA_RS09750 ←                    | fructose-bisphosphate<br>aldolase                                |
| 1,989,637 | 2 bp→AC  | (421-423/882<br>nt)<br>coding                       | SSA_RS09750 ←                    | fructose-bisphosphate<br>aldolase                                |
| 1,989,640 | 3 bp→ACC | (421-423/882<br>nt)                                 | SSA_RS09750 ←                    | fructose-bisphosphate<br>aldolase                                |
| 1,989,646 | G→A      | A139T<br>(GCC→ACT)                                  | SSA_RS09750 ←                    | fructose-bisphosphate<br>aldolase                                |
| 1,989,648 | C→T      | A139T<br>(GCC→ACT)                                  | SSA_RS09750 ←                    | fructose-bisphosphate<br>aldolase                                |
| 1,989,650 | G→C      | A138G<br>(GCT→GGT)<br>coding<br>(410-411/882<br>nt) | SSA_RS09750 ←                    | fructose-bisphosphate<br>aldolase                                |
| 1,989,652 | 2 bp→AA  | I131I                                               | SSA_RS09750 ←                    | fructose-bisphosphate<br>aldolase                                |
| 1,989,670 | T→G      | (ATA→ATC)                                           | SSA_RS09750 ←                    | fructose-bisphosphate<br>aldolase                                |
| 2,053,043 | Δ1 bp    | intergenic<br>(-59/-352)                            | pnp ← / →<br>SSA_RS10055         | polyribonucleotide<br>nucleotidyltransferase/MFS<br>transporter  |
| 2,239,359 | A→T      | S25T<br>(TCG→ACG)                                   | SSA_RS10965 ←                    | hypothetical protein                                             |
| 2,327,141 | 2 bp→TTT | intergenic<br>(-126/-42)                            | SSA_RS11370 ← /<br>→ SSA_RS11375 | cation transporter/TetR/AcrR<br>family transcriptional regulator |
| 2,327,146 | A→T      | intergenic<br>(-131/-38)                            | SSA_RS11370 ← /<br>→ SSA_RS11375 | cation transporter/TetR/AcrR<br>family transcriptional regulator |
| 2,351,801 | G→C      | intergenic<br>(-3/+200)                             | SSA_RS11505 ← /<br>← rpsD        | NAD(P)-dependent<br>oxidoreductase/30S ribosomal<br>protein S4   |
| 2,351,885 | Δ1 bp    | intergenic<br>(-87/+116)                            | SSA_RS11505 ← /<br>← rpsD        | NAD(P)-dependent<br>oxidoreductase/30S ribosomal<br>protein S4   |
| 2,351,889 | A→C      | intergenic<br>(-91/+112)                            | SSA_RS11505 ← /<br>← rpsD        | NAD(P)-dependent<br>oxidoreductase/30S ribosomal<br>protein S4   |
| 2,351,892 | C→A      | intergenic<br>(-94/+109)                            | SSA_RS11505 ← /<br>← rpsD        | NAD(P)-dependent<br>oxidoreductase/30S ribosomal<br>protein S4   |
| 2,355,559 | A→T      | intergenic<br>(-167/+136)                           | SSA_RS11525 ← /<br>← SSA_RS11530 | ABC transporter<br>permease/HAD family<br>phosphatase            |
| 2,362,836 | C→G      | G345A<br>(GGA→GCA)                                  | mnmA ←                           | tRNA 2-thiouridine(34) synthase<br>MnmA                          |

<sup>A</sup> Present only in strain MMZ1922.

<sup>B</sup> Present in strains MMZ1612 and MMZ1922.



**Table S2.** Primers used in this study.

| Primers           | Sequence                                                                                     | Purpose                   |
|-------------------|----------------------------------------------------------------------------------------------|---------------------------|
| Ssa_lacR-1        | 5'- CTT TAT CTG ATG GTG ATT TAA AGC ATG A -<br>3'                                            | Deleting <i>lacR</i>      |
| Ssa_lacR-2GA      | 5'- <u>GCC ATT TAT TAT TTC CTT CCT CTT TTA</u> CAT<br>CCT GTC TCT GAT TTT TAC CCA -3'        | Deleting <i>lacR</i>      |
| Ssa_lacR-3GA      | 5'- <u>ATA TTT TAC TGG ATG AAT TGT TTT AGT AGA</u><br>GCT CAG GAA GAA CTG GAA GT -3'         | Deleting <i>lacR</i>      |
| Ssa_lacR-4        | 5'- CAG ATG AGG AGC TCA CCA GTA A -3                                                         | Deleting <i>lacR</i>      |
| Ssa1918-1         | 5'- CCA GGG CAA TGG ACA GTT ATC T -3'                                                        | Deleting <i>manL</i>      |
| Ssa1918-2GA       | 5'- <u>GCC ATT TAT TAT TTC CTT CCT CTT TTA</u> CCG<br>ATA CTC ATT ATT GAC ATT CCT C -3'      | Deleting <i>manL</i>      |
| Ssa1918-3GA       | 5'- <u>ATA TTT TAC TGG ATG AAT TGT TTT AGT AGA</u><br>GCC AAC GTG CAG TAG AAT CA -3'         | Deleting <i>manL</i>      |
| Ssa1918-4         | 5'- GCA TAC GTT CGT AGT TCC AAG AA -3'                                                       | Deleting <i>manL</i>      |
| Ssa_manL_Comp-2GA | 5'- <u>GCC ATT TAT TAT TTC CTT CCT CTT TTA</u> TGA<br>TTC TAC TGC ACG TTG GCT -3'            | Complementing <i>manL</i> |
| GA-Km-5'          | 5'- TAA AAG AGG AAG GAA ATA ATA AAT GGC<br>TAA -3'                                           | Marker for GA             |
| GA-Km-3'          | 5'- TCT ACT AAA ACA ATT CAT CCA GTA AAA TAT<br>AAT ATT TT -3'                                | Marker for GA             |
| GA-Em-5'          | 5'- TAA AAG AGG AAG GAA ATA ATA AAT GGC<br>TAA CTA GAG GAT CTA GTC TTA TAA CTA TAC<br>TG -3' | Marker for GA             |
| GA-Em-3'          | 5'- TCT ACT AAA ACA ATT CAT CCA GTA AAA TAT<br>GGA CGA CGA TGA CAA GTG AT -3'                | Marker for GA             |
| GA-Sp-5'          | 5'- TAA AAG AGG AAG GAA ATA ATA AAT GGC<br>TGG GAG CTC TCC GGA TCC AA -3'                    | Marker for GA             |
| GA-Sp-3'          | 5'- TCT ACT AAA ACA ATT CAT CCA GTA AAA TAT<br>ATG CTC CTC TAG ACT CGA GGA A -3'             | Marker for GA             |

---

|                 |                                                     |                   |
|-----------------|-----------------------------------------------------|-------------------|
| GA-Seq-5'       | 5'- TAG CCA TTT ATT ATT TCC TTC CTC TT -3'          | Sanger sequencing |
| GA-Seq-3'       | 5'- ATA TTT TAC TGG ATG AAT TGT TTT AGT AGA -3'     | Sanger sequencing |
| Ssa_1927-5'     | 5'- GGA GTT GCT TCG TGA ACA GCA A -3'               | Sanger sequencing |
| Ssa_1927-3'     | 5'- CCG AGT TCA ACT CAG AGA AAA TCA A -3'           | Sanger sequencing |
| Ssa_1918-500-5' | 5'- CGT TGA AGC TGT TGT TGC TAA CA -3'              | Sanger sequencing |
| Ssa_1918-840-3' | 5'- CAG TTG AGT GAG CCA TGG AAC CAA -3'             | Sanger sequencing |
| Ssa_alkD-5'     | 5'- GAC GGC AAG CGT CTC GT -3'                      | Sanger sequencing |
| Ssa_alkD-3'     | 5'- CCT TCC AGC CAA ACC GAG AA -3'                  | Sanger sequencing |
| Ssa_1885-5'     | 5'- ATC CAG GCA CTA CAC AAT AAG TTA A -3'           | Sanger sequencing |
| Ssa_1885-3'     | 5'- AAG GCA TTT TTT ATC CTC CAT TTT ATA AA -3'      | Sanger sequencing |
| Ssa_1885-607    | 5'- GCT AAT AGT AAA AAA GAT GAT AGA GTG AGT CAT -3' | Sanger sequencing |
| Ssa_1885-1485Rv | 5'- GAA TAA CGA TTT CTG CTT TTC CAC ATT ATA GTA -3' | Sanger sequencing |
| Ssa_rpsD-492    | 5'- GAC GGC AAA CGC GTT GA -3'                      | Sanger sequencing |
| Ssa_galE1-300Rv | 5'- CTC CCA GGG TCC CCA AA -3'                      | Sanger sequencing |
| Ssa_citB-5'     | 5'- CAC GGG TTT CTT TGG TAT GAA TGT -3'             | Sanger sequencing |
| Ssa_citB-70Rv   | 5'- AGG CTT TTT CAA GGT CTA CAT ATT GG -3'          | Sanger sequencing |

---

---

|               |                                                                                               |                      |
|---------------|-----------------------------------------------------------------------------------------------|----------------------|
| Ssa_ccpA-1    | 5'- GCG GTC TAC TTC ATG AGC T -3'                                                             | Deleting <i>ccpA</i> |
| Ssa_ccpA-2GA  | 5'- <u>GCC ATT TAT TAT TTC CTT CCT CTT TTA</u> CTG TGT CGT CTG TGT TCA TAT AGT -3'            | Deleting <i>ccpA</i> |
| Ssa_ccpA-3GA  | 5'- <u>ATA TTT TAC TGG ATG AAT TGT TTT AGT AGA</u> GCA TTA GCG AGC GTA AAT CAA CT -3'         | Deleting <i>ccpA</i> |
| Ssa_ccpA-4    | 5'- TCC TCA TAG GAC GGG AAA AAG AA -3'                                                        | Deleting <i>ccpA</i> |
| Ssa_arcA-1    | 5'- ATC ATG ATT ACC AAG GAG CAT TAT CAA T -3'                                                 | Deleting <i>arcA</i> |
| Ssa_arcA-2GA  | 5'- <u>GCC ATT TAT TAT TTC CTT CCT CTT TTA</u> CAG TAC ATG GTT AAT ATT AGA ATA TTT TGA AT -3' | Deleting <i>arcA</i> |
| SK36_arcA-3GA | 5'- <u>ATA TTT TAC TGG ATG AAT TGT TTT AGT AGA</u> GTC TAT GCC ATT TGA ACG TGA AGA -3'        | Deleting <i>arcA</i> |
| Ssa_arcA-4    | 5'- CTG CTT GGT CAA AAT GAC GAG CA -3'                                                        | Deleting <i>arcA</i> |
| Ssa_arcA-S    | 5'- TGG CAA TAT CGT AGC TGC TG -3'                                                            | RT-qPCR              |
| Ssa_arcA-AS   | 5'- TGT TGC GGT CAT ACA CCA CT -3'                                                            | RT-qPCR              |
| Ssa_1176-S    | 5'- AAC CAG CGG TTT TAT TGG TG -3'                                                            | RT-qPCR              |
| Ssa_1176-AS   | 5'- CAT TGG CAC ATC TTC ACC TG -3'                                                            | RT-qPCR              |
| Ssa_1221-S    | 5'- CTT CCT CGT TGC TGC TAA CC -3'                                                            | RT-qPCR              |
| Ssa_1221-AS   | 5'- GGA AGC GAG CTG AGT CAA GT -3'                                                            | RT-qPCR              |
| Ssa_1137-S    | 5'- CGG AGA GCT GAA GAA GCA GT -3'                                                            | RT-qPCR              |
| Ssa_1137-AS   | 5'- CCT TCT CAG CCT CAT CCT TG -3'                                                            | RT-qPCR              |
| Ssa_0342-S    | 5'- CTT GGC AGG TCC TAC TGA GC -3'                                                            | RT-qPCR              |

---

---

|                 |                                         |         |
|-----------------|-----------------------------------------|---------|
| Ssa_0342-<br>AS | 5'- AGT GTC CAT TGG GAA ACG AG -3'      | RT-qPCR |
| Ssa_spxB-S      | 5'- ATC ACT CAA CAC CGT CCA CTT CCA -3' | RT-qPCR |
| Ssa_spxB-<br>AS | 5'- TCT TCC AAG AAG AGG CGG AAT GGT -3' | RT-qPCR |
| Ssa_nox-S       | 5'- GAT ACT TGC TTG GCG GGT TA -3'      | RT-qPCR |
| Ssa_nox-AS      | 5'- GGC CAA AGG CTA ATT GAA CA -3'      | RT-qPCR |
| Ssa_ackA-S      | 5'- GAC CCA GCC ATC ATT CCT TA -3'      | RT-qPCR |
| Ssa_ackA-<br>AS | 5'- AAG CAA GCC AGA TTC ACG AT -3'      | RT-qPCR |
| Ssa_pta-S       | 5'- GCT CAG CTA TTC GAC CAA GG -3'      | RT-qPCR |
| Ssa_pta-AS      | 5'- CAA ACT GCA ATT CAC CAT CG -3'      | RT-qPCR |
| Ssa_pykF-S      | 5'- AAC GGC CAT GTT CAA TTG TT -3'      | RT-qPCR |
| Ssa_pykF-<br>AS | 5'- TAC CGT CAG CAG CTT CAA TG -3'      | RT-qPCR |

---

**Fig. S1.** Growth curves of the *lacR* mutant with a deficiency in glucose-PTS (*manLQ217\**). The wild type SK36 (MMZ1896) and the *lacR* mutant strain were cultured in BHI till exponential phase ( $OD_{600} = 0.5$ ), diluted 100-fold into FMC media supplemented with 10 mM glucose (Glc), galactose (Gal), GlcN or GlcNAc, covered with 60  $\mu$ L of mineral oil, and then monitored for growth on a Bioscreen C system maintained at 37°C.

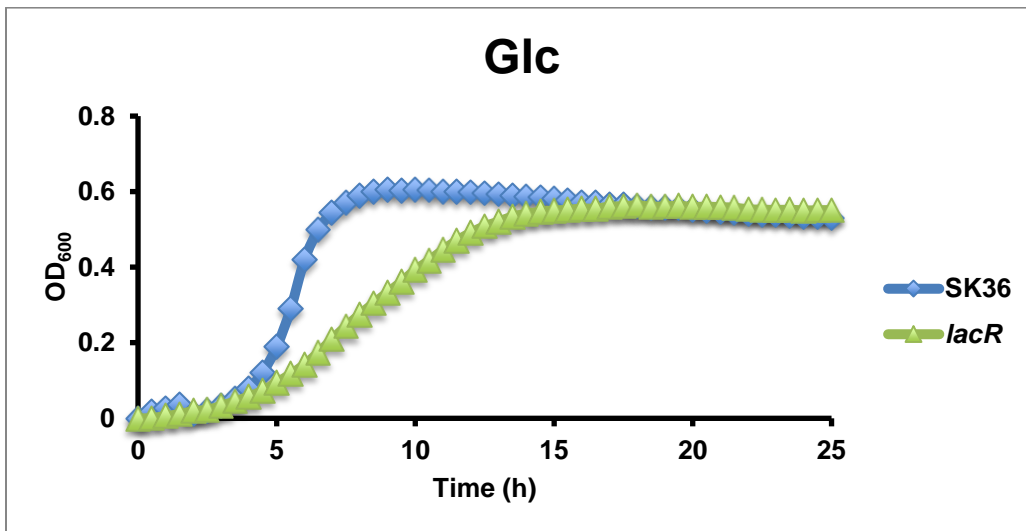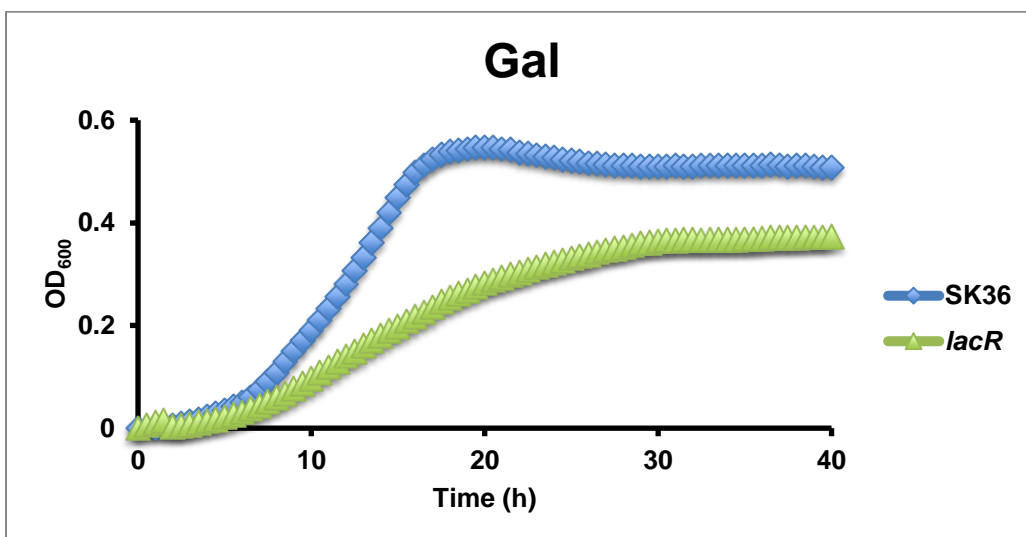

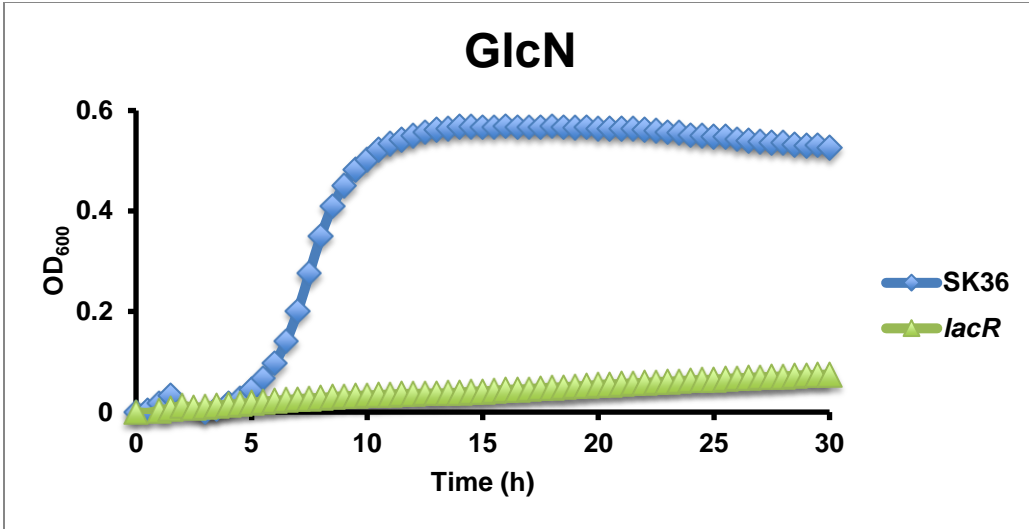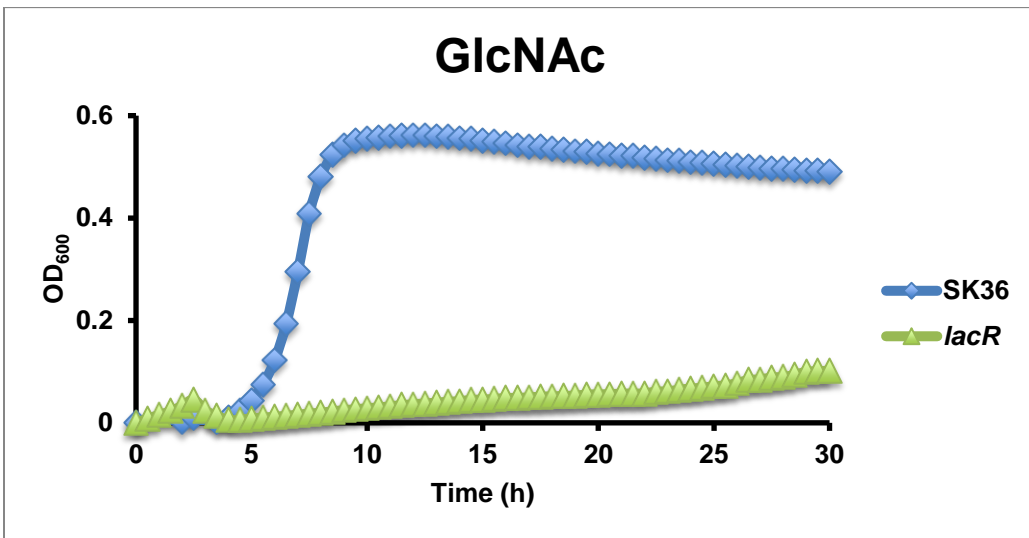

**Fig. S2.** Growth curves of SK36, the *manL* mutant and the *manLComp* strain. Strains were each cultured in BHI till exponential phase ( $OD_{600} = 0.5$ ), diluted 100-fold into FMC media supplemented with 10 mM glucose (Glc), galactose (Gal), GlcN or GlcNAc for growth monitoring.

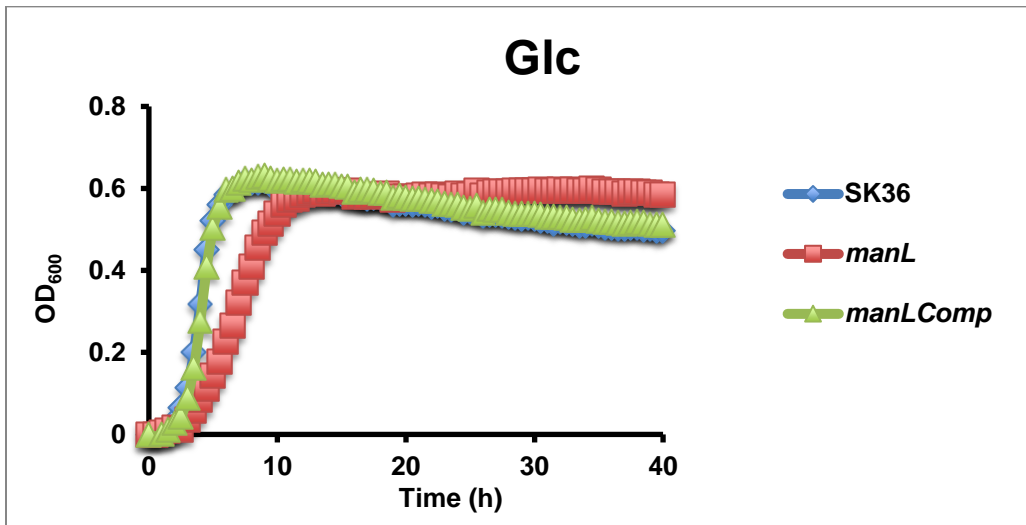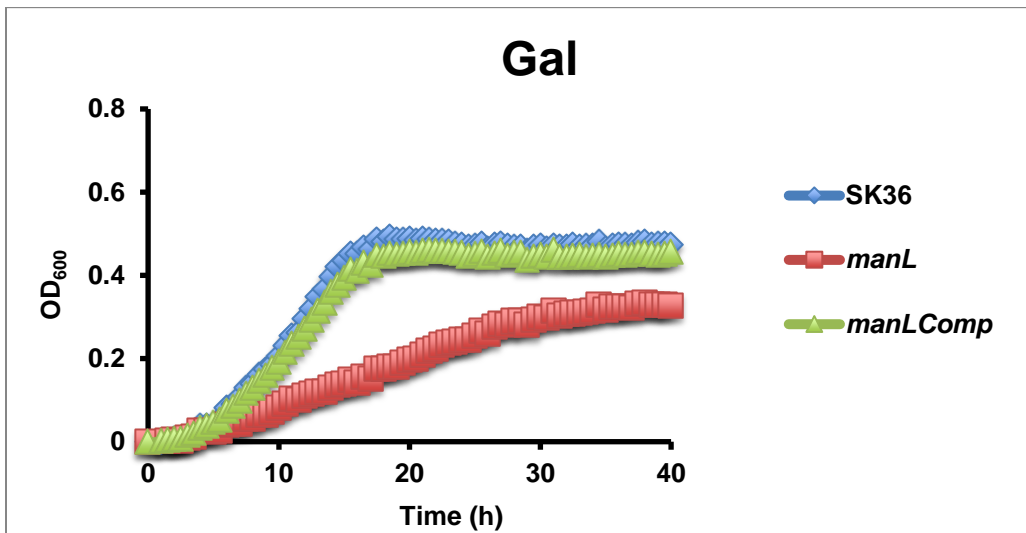

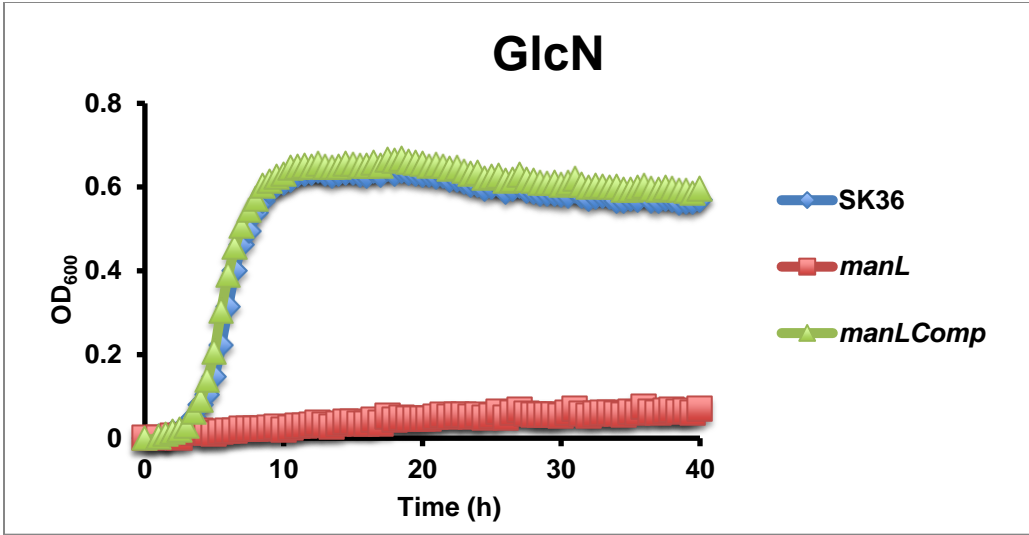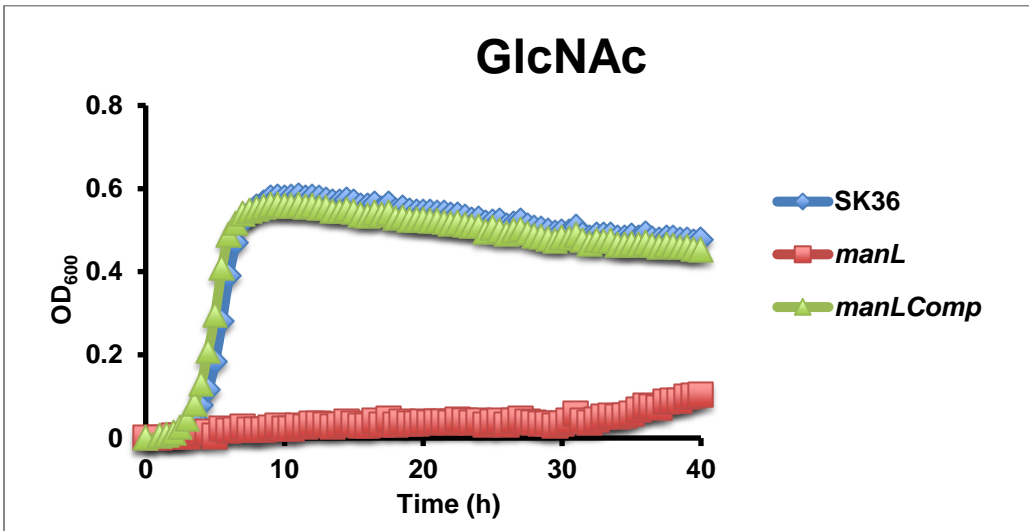



**Fig. S3.** Antagonism of *S. mutans* (top) and H<sub>2</sub>O<sub>2</sub> production (below) by strains SK36, *manL* mutants and *manLComp*.

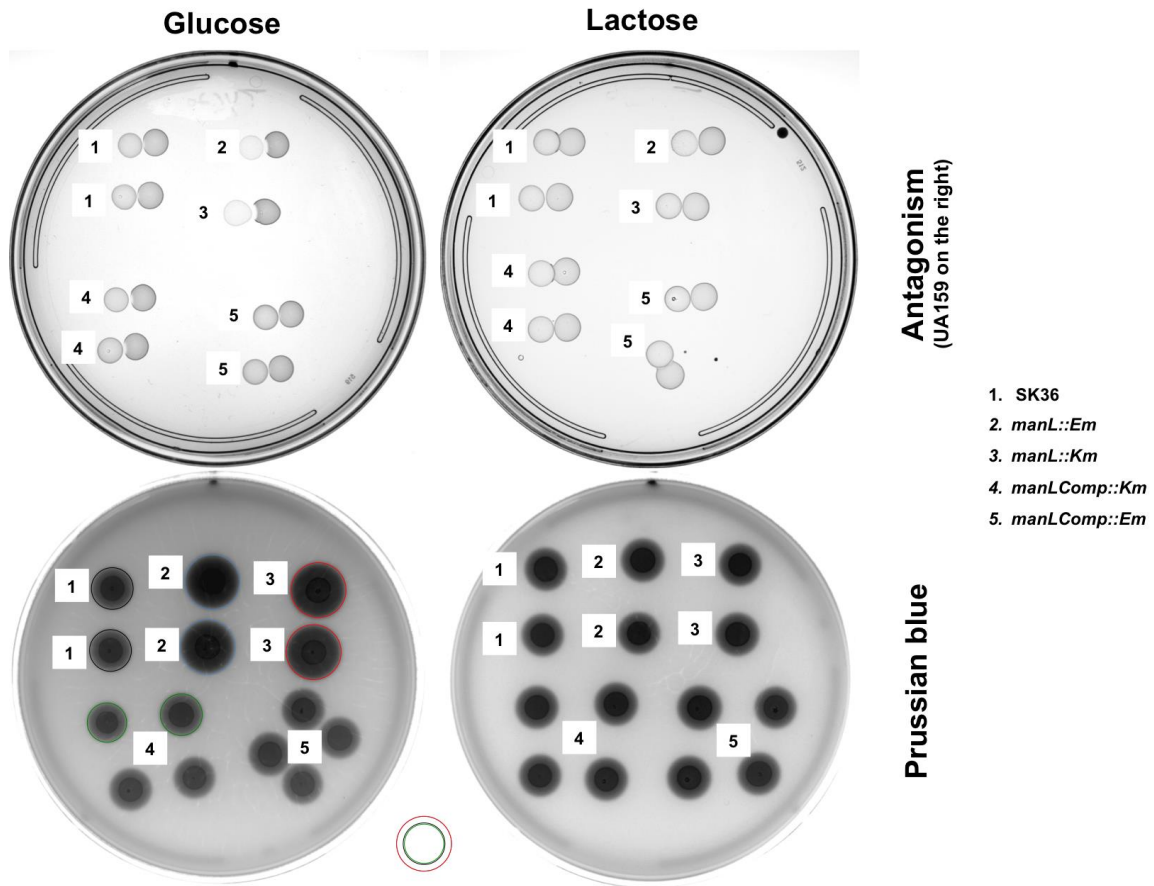

**Fig. S4.** RT-qPCR showing levels of transcripts of genes belonging to the central carbon metabolism. Strains SK36, *manL* mutant, and *manLComp* were cultivated in TY supplemented with 20 mM glucose (G) or 10 mM lactose (Lac) till exponential phase ( $OD_{600} = 0.5$ ) before harvesting. Total RNAs were subjected to reverse transcription with gene-specific primers, followed by quantitative PCR (qPCR). Transcript levels are calculated on the basis of  $\Delta Cq$  relative to that of the housekeeping gene *gyrA*. Each sample was represented by at least three biological replicates and assayed at least twice in qPCR. The bars represent the means and error bars the standard deviations.

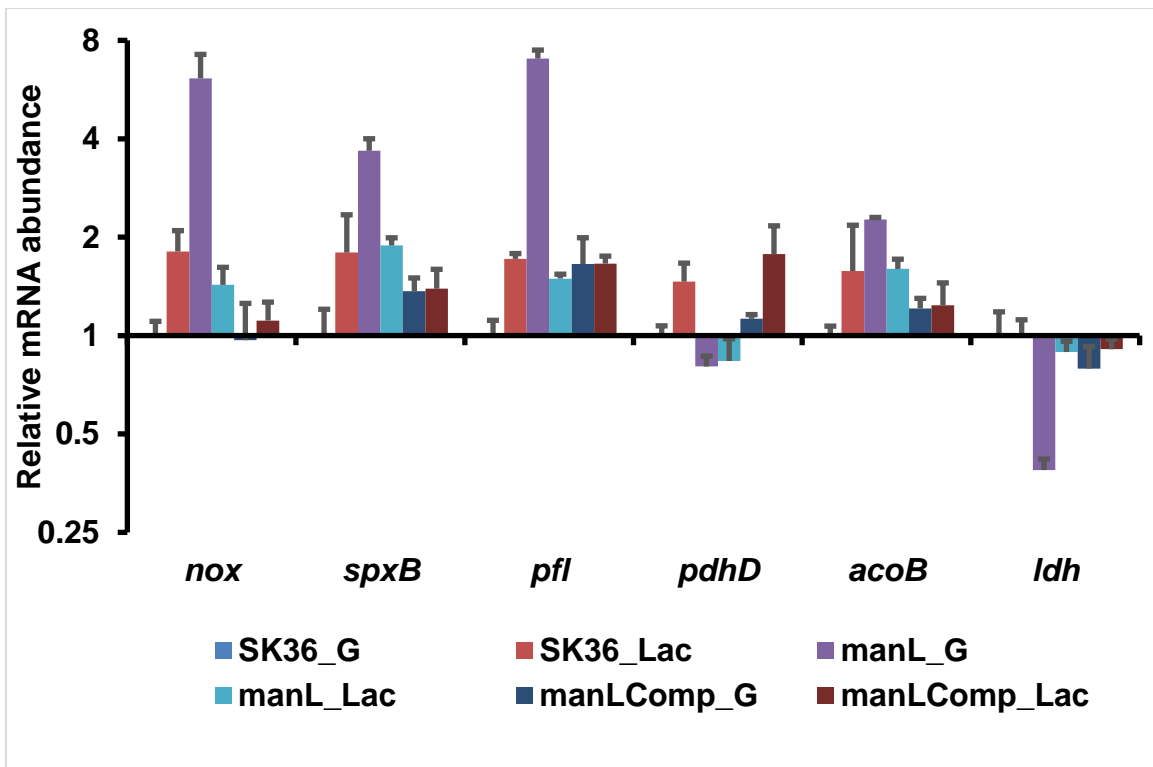

**Fig. S5.** Characterization of three SK36 stocks and their respective mutant derivatives: SK36\_1612, manL\_1616 (Em), manL\_1617 (Km), manLComp\_1904 (Km), manLComp\_1905 (Em); SK36\_1896, manL\_1882 (Km); SK36\_1922, manL\_1923 (Km). Strains were each cultured in TY-Glc (A to E) or BHI (C, E, F, G) overnight (>20 h) and measured for final OD<sub>600</sub> (A), extracellular pyruvate (B), final pH (C), eDNA release as relative fluorescence units (D), growth curves (E) after dilution of BHI cultures (at 1:100) into fresh TY-Glc medium, CFU enumeration of BHI cultures (F), and H<sub>2</sub>O<sub>2</sub> production on TY-Glc/Prussian blue plates (G). 5 mM of pyruvate was added to one set of SK36\_1922 TY-Glc cultures (A to D).

A

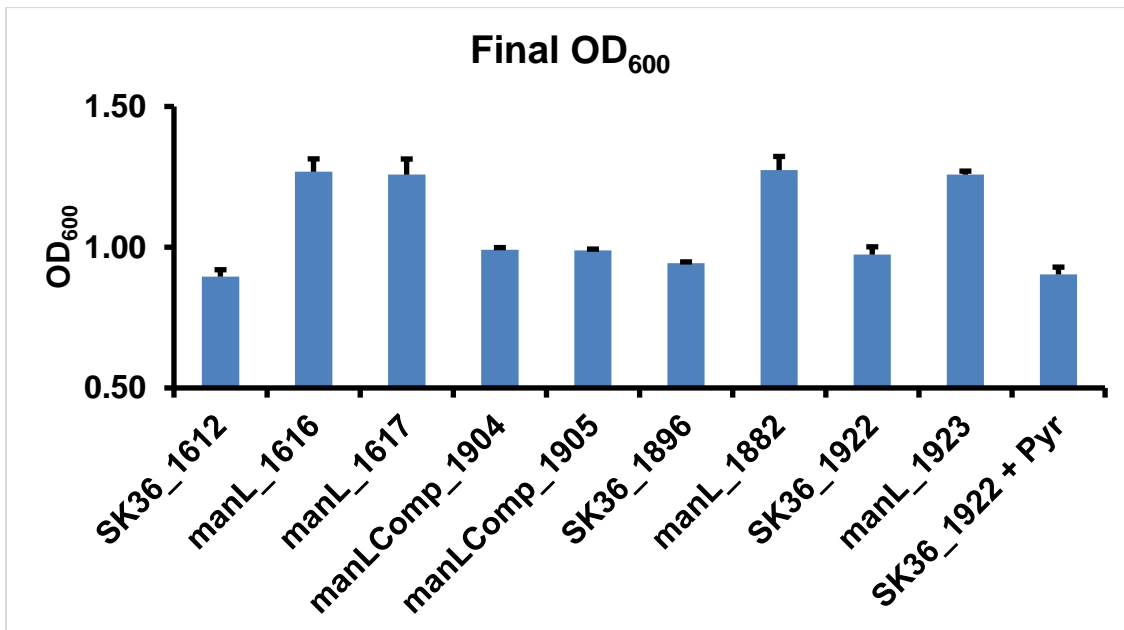

B

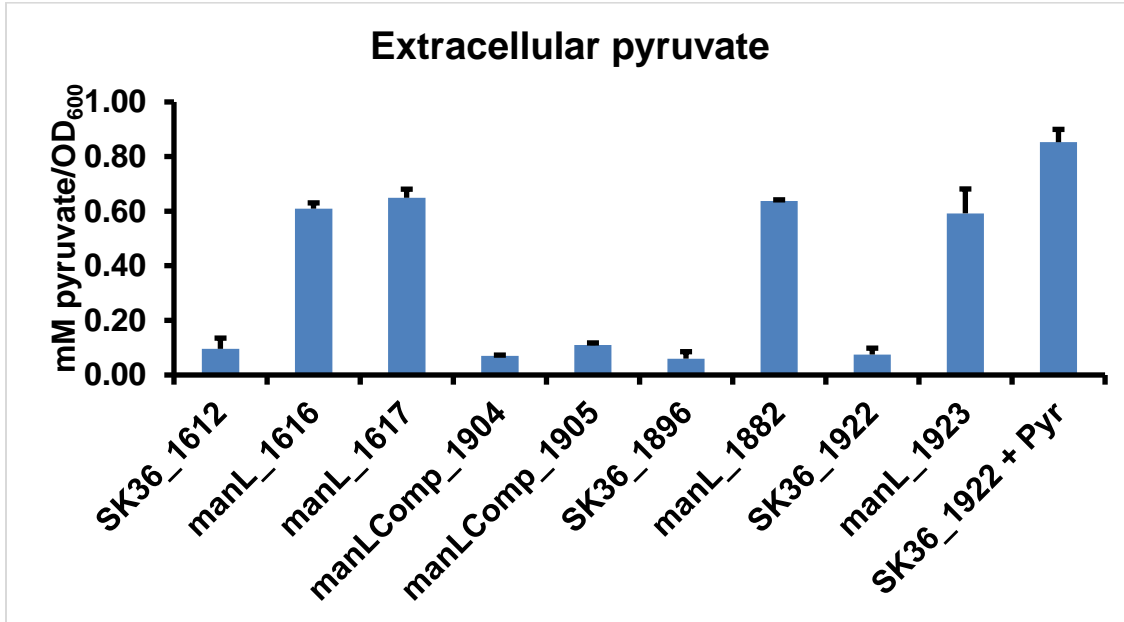

C

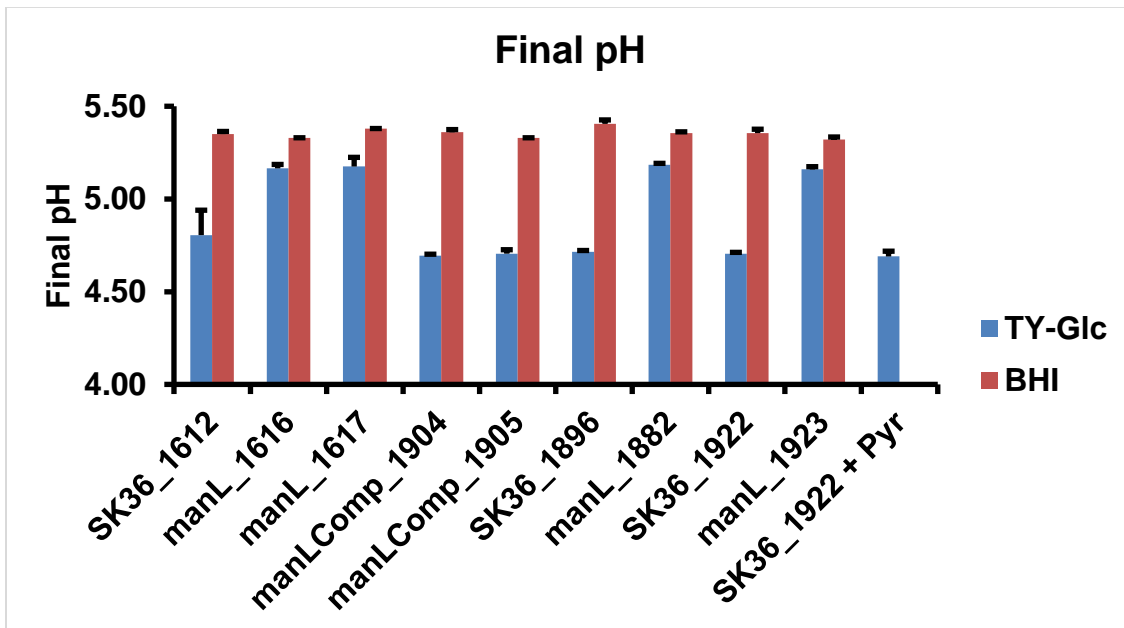

D

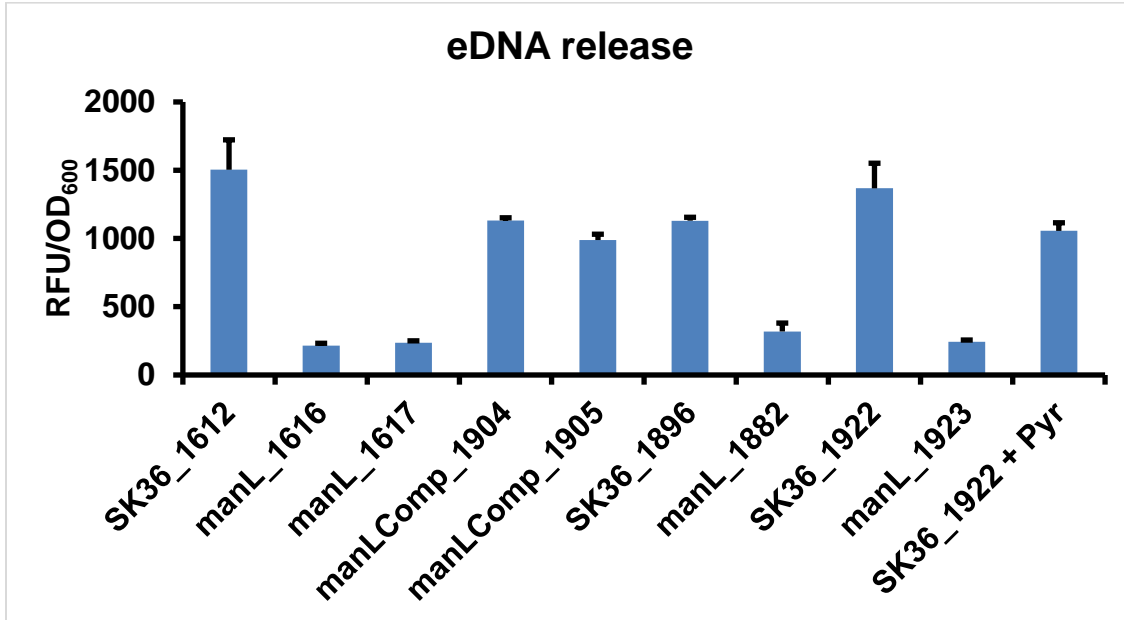

E

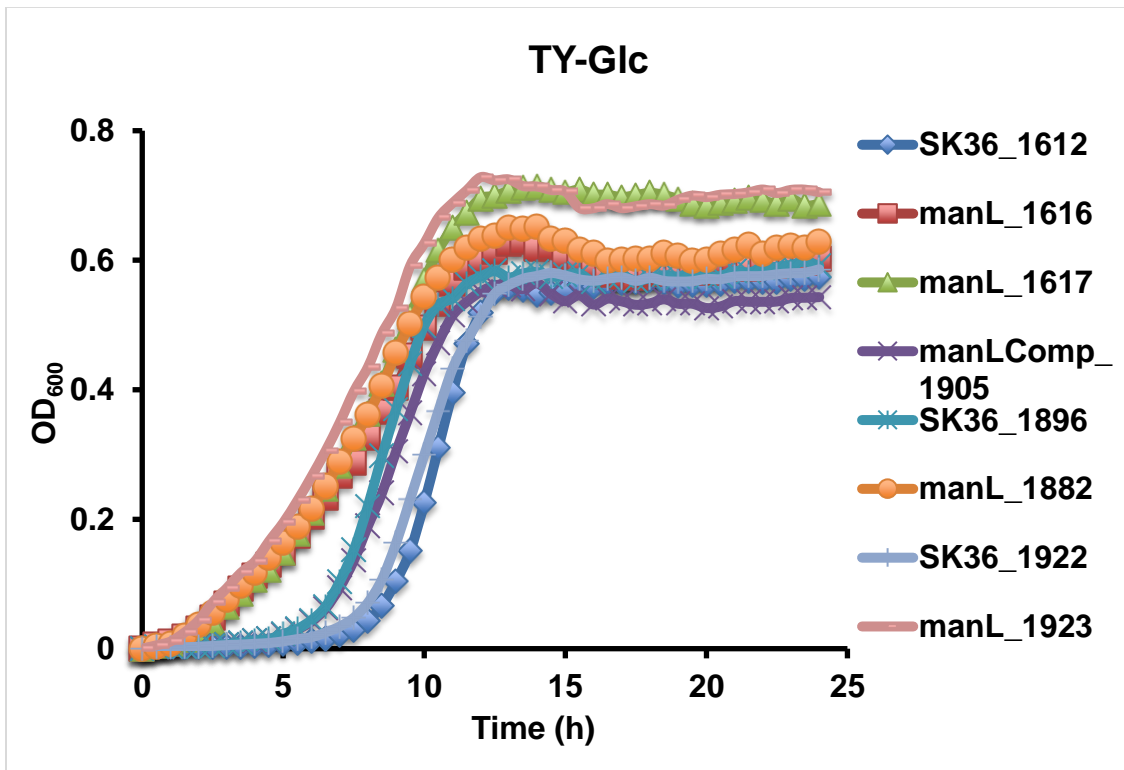

F

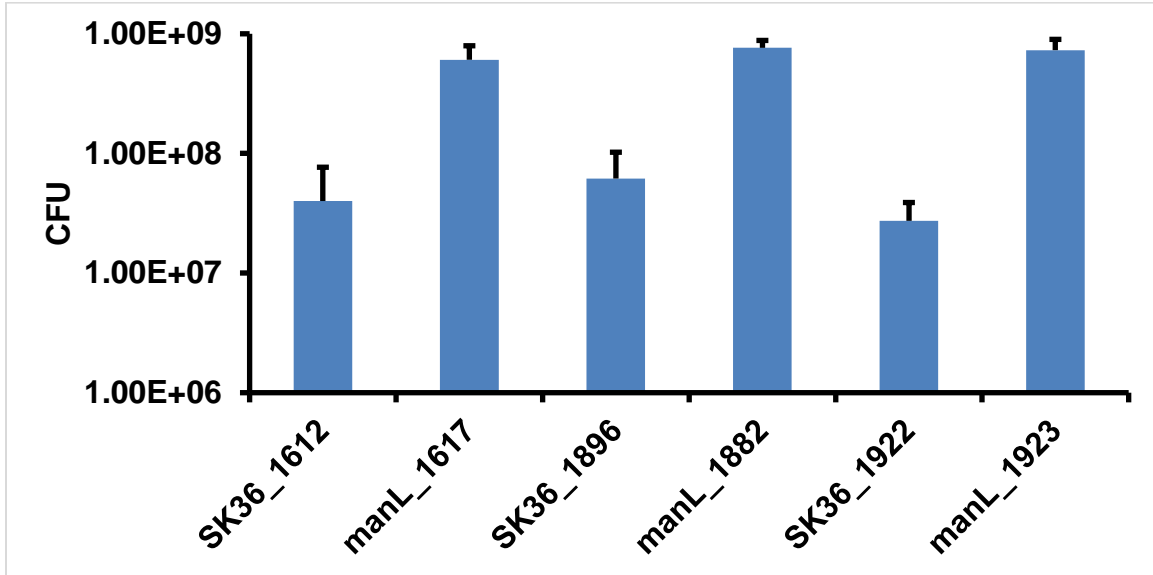

G

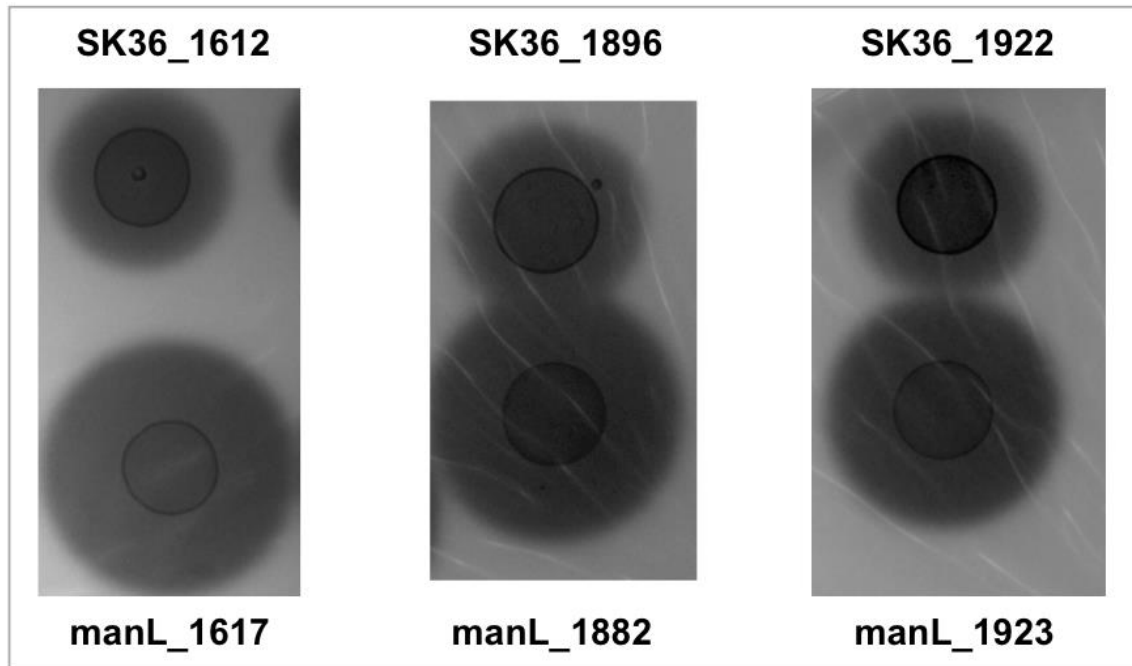

**Fig. S6.** Results of multi-locus sequence typing (MLST) analysis performed using genome sequences of SK36 from GenBank (SK36), ATCC stock BAA-1455 (MMZ1922), *S. mutans* UA159, and a collection of clinical isolates from the genus of Streptococcus that were recently sequenced (1). The final alignment was visualized using the Ape package in the R environment.

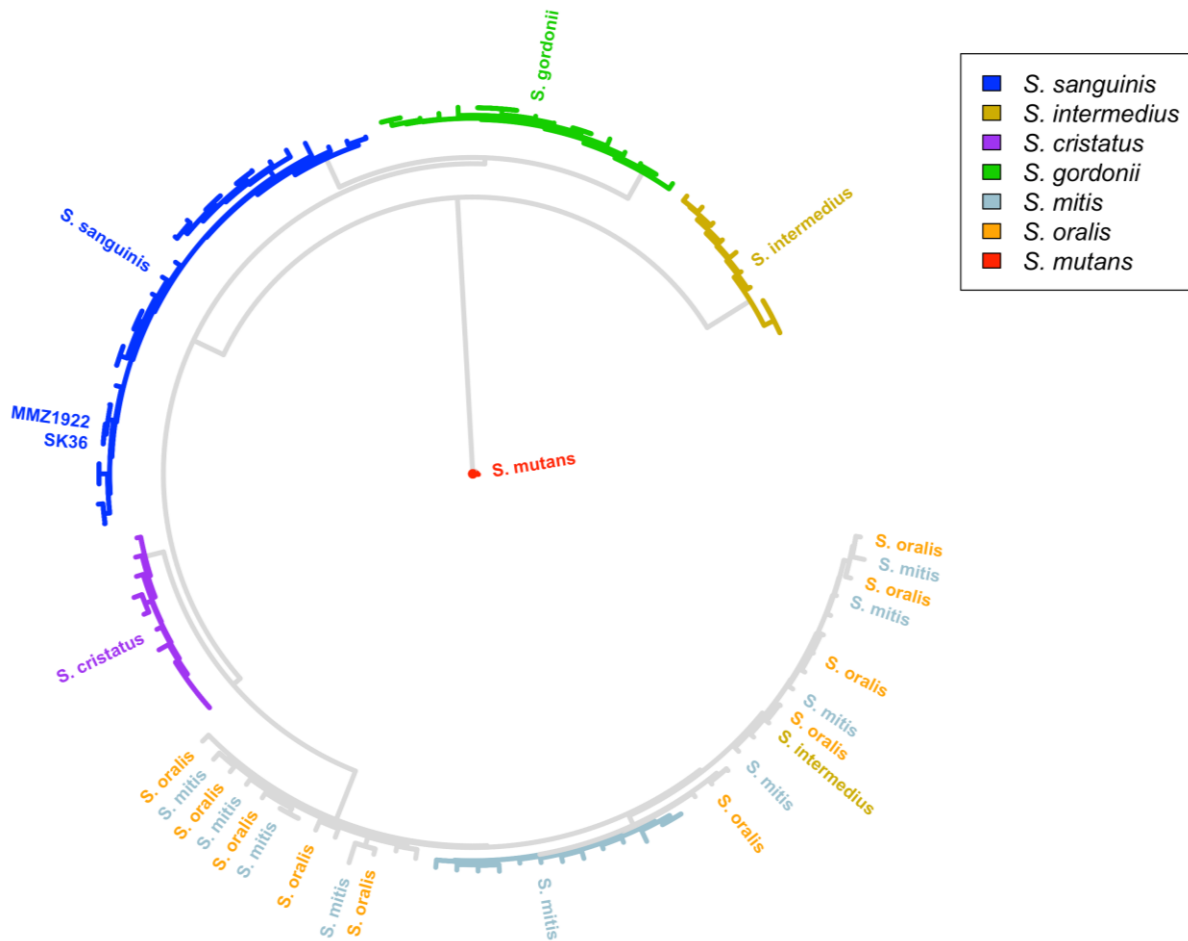

**Fig. S7.** Pyruvate levels measured in cultures of clinical isolates of commensal bacteria (A) and whole saliva sample (B). Clinical isolates were inoculated into TY media supplemented with 20 mM of glucose (Glc) or 10 mM of lactose (Lac) and incubated for 20 h at 37°C in an aerobic atmosphere maintained with 5% CO<sub>2</sub>. Asterisks indicate strains isolated from only caries-free subjects (1), whereas the rest are derived from both caries-free and caries-active patients (2). The donor saliva was similarly cultured in a biofilm medium (3) supplemented with 20 mM of glucose, fructose, galactose, GlcN, GlcNAc, or 10 mM of lactose, sucrose, or maltose. The cultures were harvested by centrifugation (room temperature, 16,000× *g*, 2 min) before the supernates were removed for pyruvate assay. Each sample was represented by three biological repeats and the results (mM/OD<sub>600</sub>) are each the average and standard deviation (error bars).

A

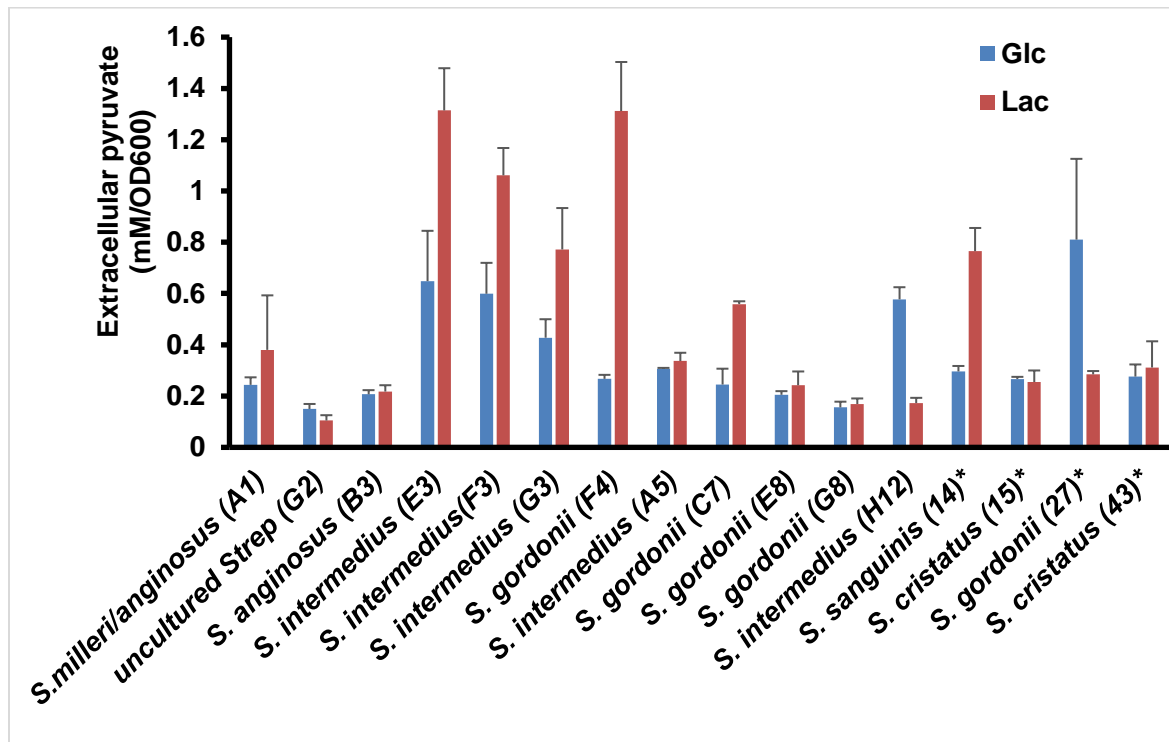



B

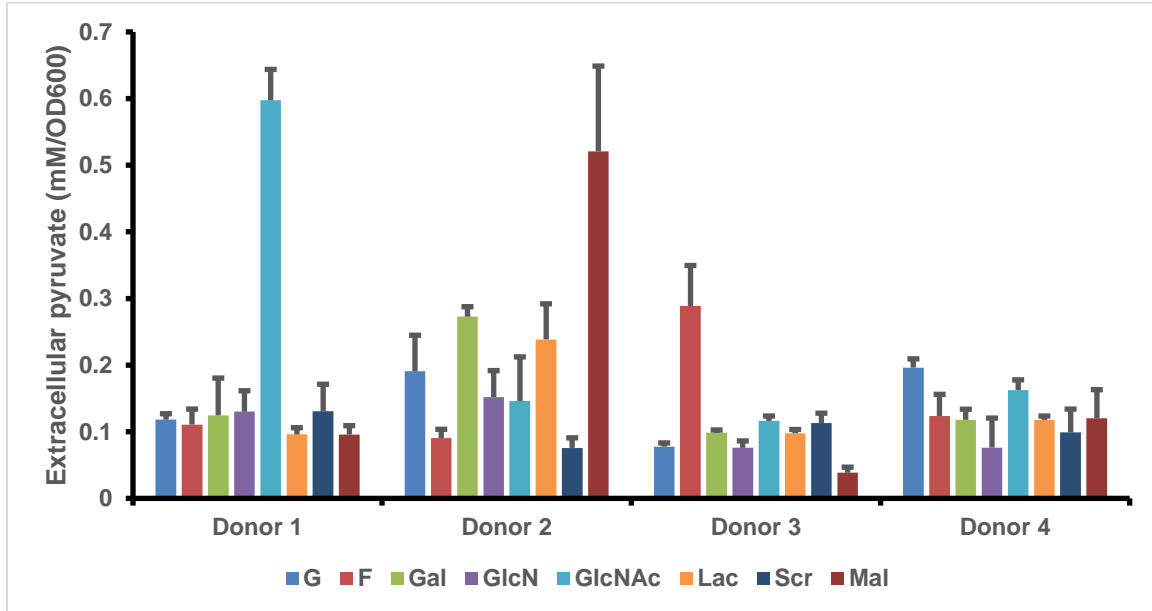

## Reference

1. Velsko IM, Chakraborty B, Nascimento MM, Burne RA, Richards VP. 2018. Species designations belie phenotypic and genotypic heterogeneity in oral streptococci. *mSystems* 3:e00158-18.
2. Garcia BA, Acosta NC, Tomar SL, Roesch LFW, Lemos JA, Mugayar LRF, Abranches J. 2021. Association of *Candida albicans* and Cbp+ *Streptococcus mutans* with early childhood caries recurrence. *Scientific reports* 11:10802.
3. Loo CY, Corliss DA, Ganeshkumar N. 2000. *Streptococcus gordonii* biofilm formation: identification of genes that code for biofilm phenotypes. *J Bacteriol* 182:1374-82.
